1     **Behavioural consequences of *Setd1a* haploinsufficiency in mice:**  
2             **evidence for heightened emotional reactivity and impaired**  
3                     **sensorimotor gating**

4  
5     Matthew L. Bosworth<sup>1</sup>, Anthony R. Isles<sup>1</sup>, Lawrence S. Wilkinson<sup>1,2</sup>, & Trevor  
6     Humby<sup>2\*</sup>

7  
8     <sup>1</sup>MRC Centre for Neuropsychiatric Genetics and Genomics, Division of Psychological  
9     Medicine and Clinical Neuroscience, School of Medicine, Cardiff University, Cardiff,  
10    UK

11   <sup>2</sup>School of Psychology, Cardiff University, Cardiff, UK

12  
13   \*Corresponding author: Dr Trevor Humby [HumbyT@cardiff.ac.uk](mailto:HumbyT@cardiff.ac.uk) Tel. +44(0)2920  
14   876758

15  
16

17 **ABSTRACT**

18 A number of studies implicate the loss of function (LoF) mutations affecting the  
19 histone methyl transferase *SETD1A* in the aetiology of a range of  
20 neurodevelopmental disorders including schizophrenia. Here, we examined the  
21 behavioural consequences of haploinsufficiency of *Setd1a* in a mouse model. We  
22 find evidence for changes in a number of phenotypes of relevance to schizophrenia,  
23 including increased anxiety-related behaviour, enhanced acoustic startle response,  
24 and decreased pre-pulse inhibition of acoustic startle. The sensorimotor gating  
25 deficits in *Setd1a*<sup>+/-</sup> mice could not be rescued by haloperidol or risperidone,  
26 suggesting that these antipsychotics are ineffective for ameliorating schizophrenia-  
27 relevant phenotypes in *Setd1a*<sup>+/-</sup> mice and point to deficits in neural systems other  
28 than the monoamine system. These phenotypes are emerging as key features of a  
29 number of other mouse models of rare neurodevelopmental disorders caused by LoF  
30 mutations in genes encoding epigenome modifiers suggesting they may act in a  
31 network to modulate brain development. Taken together these data strengthen the  
32 support for the use of *Setd1a* haploinsufficient mice as a model for the biological  
33 basis of schizophrenia, and point towards possible underpinning neural mechanisms.

34

35 **Keywords:** schizophrenia; developmental delay; startle response; pre-pulse  
36 inhibition; haloperidol; risperidone

## 37 INTRODUCTION

38 Exome sequencing studies have implicated loss of function (LoF) mutations in the  
39 *SETD1A* (SET Domain Containing 1A) gene that increase susceptibility for  
40 schizophrenia (1-5). *SETD1A* LoF mutations have also been reported in children with  
41 diverse neurodevelopmental disorders (4, 6), childhood apraxia of speech (7), and  
42 early-onset epilepsy (8). While these genetic variants are rare (occurring in 0.13 % of  
43 schizophrenia cases), they are highly penetrant and their effects on gene function  
44 (i.e. haploinsufficiency) can be recapitulated in model systems. Consequently,  
45 *SETD1A* provides a biologically tractable target for disease modelling.

46 *SETD1A* encodes a subunit of a histone methyltransferase complex that catalyses  
47 methylation of lysine residue 4 on histone 3 (H3K4) (9). Previous studies have  
48 implicated a role for *SETD1A* in a range of biological functions, including cell cycle  
49 regulation (10-12), maintenance of pluripotency in embryonic stem cells (13-15) and  
50 neuronal progenitors (16, 17), and DNA repair (11, 18, 19). In terms of the role of  
51 *SETD1A* in brain and behaviour, previous work in mice has shown that *Setd1a*  
52 haploinsufficiency causes working memory impairments, axonal branching deficits,  
53 impaired synaptic plasticity, and abnormal cortical ensemble activity (20, 21). Further  
54 evidence for impaired working memory in mice haploinsufficient for *Setd1a* has been  
55 reported by Nagahama *et al.* (22), who also observed a broader range of behavioural  
56 phenotypes, including hyperactivity, altered social behaviour, and some evidence for  
57 impaired sensorimotor gating. Other work in *Drosophila* has shown that short- and  
58 long-term courtship memory is impaired by conditional knockdown of *Set1* in  
59 neurons of the mushroom body (6).

60 Here, we further explore behavioural consequences of *Setd1a* haploinsufficiency in a  
61 mouse model. We find evidence for increased anxiety-related behaviour, enhanced  
62 acoustic startle response, and decreased pre-pulse inhibition of acoustic startle.  
63 These behavioural changes, and the sensorimotor gating impairments in particular,  
64 are phenotypes of particular relevance to schizophrenia. However, the sensorimotor  
65 gating deficits could not be rescued by haloperidol or risperidone, suggesting that  
66 these antipsychotics are ineffective for ameliorating schizophrenia-relevant  
67 phenotypes in *Setd1a*<sup>+/-</sup> mice. Taken together these data strengthen the support for  
68 the use of *Setd1a* haploinsufficient mice as a model for the biological basis of  
69 schizophrenia, and point towards possible underpinning neural mechanisms.

70

## 71 MATERIALS AND METHODS

### 72 **Animals**

73 All procedures were conducted in accordance with the UK Animals (Scientific  
74 Procedures) Act 1986. *Setd1a*<sup>+/-</sup> mice were produced using a strain created by the  
75 Knockout Mouse Phenotyping Consortium (23). To generate a model with a  
76 constitutive germline transmissible knockout allele, male C57BL/6NTac-  
77 *Setd1a*<sup>tm1c(EUCOMM)Wtsi/WtsiCnrm</sup> mice (obtained from MRC Harwell) were paired with  
78 female B6.C-Tg(CMV-cre)1Cgn/J mice (obtained from The Jackson Laboratory) (24).  
79 F1 male progeny were genotyped to identify animals heterozygous for the  
80 *Setd1a*<sup>CMV-cre/+</sup> allele. These were crossed with C57BL/6J females (obtained from  
81 Charles River) to enable removal of the X-linked CMV-cre transgene from males in  
82 the F2 generation. Experimental cohorts were generated by pairing male F2  
83 *Setd1a*<sup>+/-</sup> mice with C57BL/6J females.

84 Animals were weaned on postnatal day 28 and housed in mixed-genotype cages  
85 with littermates of the same sex (2-5 per cage). Standard laboratory chow and water  
86 was available *ad libitum* throughout all experiments. Holding rooms were maintained  
87 on a 12-hour light-dark cycle (lights on from 08:00-20:00) at a temperature of 21 ( $\pm$   
88 2) °C and 50 ( $\pm$  10) % humidity.

89

### 90 **Model validation**

91 To confirm *Setd1a* haploinsufficiency in our model, levels of *Setd1a* mRNA and  
92 protein were quantified in whole brains dissected at E13.5. RNA extraction was  
93 performed using a Direct-zol<sup>TM</sup> RNA Miniprep Kit (Zymo, UK). 1  $\mu$ g total RNA was  
94 used for cDNA synthesis using RNA to cDNA EcoDry<sup>TM</sup> Premix (double-primed) kits  
95 (Clontech, UK). qRT-PCR reactions were performed in triplicate using a Corbett  
96 Rotorgene 6000 Real-Time PCR machine with Sensimix SYBR No-Rox (Bioline, UK)  
97 and intron-spanning primers (Table S1). The geometric mean of Ct values across  
98 three housekeeping genes (*Hprt*, *Dynein*, and *B2m*) were used as endogenous  
99 controls to normalise *Setd1a* expression levels using the  $\Delta\Delta$ CT method (25).

100 Protein was extracted from brain homogenates in RIPA buffer (Sigma, UK)  
101 containing cOmplete<sup>TM</sup> Mini Protease Inhibitor Cocktail (Roche, Switzerland). A  
102 Pierce<sup>TM</sup> BCA Protein Assay kit (Thermo Scientific, UK) was used to quantify protein  
103 concentration. Samples were diluted in protein loading buffer (LI-COR, UK)  
104 containing 0.05 % (v/v) 2-Mercaptoethanol (Sigma, UK) and denatured by heating at

105 95 °C for five minutes. 20 µg total protein per sample was separated by SDS-PAGE  
106 using a NuPAGE™ 4-12 % Tris-Acetate gel (Invitrogen, UK) and NuPAGE™ Tris-  
107 Acetate SDS Running Buffer (Invitrogen, UK). Proteins were transferred to a 0.45 µm  
108 pore size nitrocellulose membrane (Invitrogen, UK) in NuPAGE™ Transfer Buffer  
109 (Invitrogen, UK) containing 10 % (v/v) methanol (Fisher Scientific, UK). To enable  
110 normalisation of *SETD1A* protein abundance, membranes were stained for total  
111 protein using REVERT™ Total Protein Stain (LI-COR, UK). Odyssey TBS Blocking  
112 Buffer (LI-COR, UK) was used to block membranes for one hour at room  
113 temperature. Membranes were incubated overnight at 4 °C with 1:1,000 polyclonal  
114 *Setd1a* antibody (Bethyl Laboratories, USA). TBS-T (1M NaCl, 1M Tris-HCl, 0.2 %  
115 (v/v) Tween 20) was used to wash the membrane four times (5 minutes per wash)  
116 before incubation in 1:10,000 IRDye 800CW goat anti-rabbit secondary antibody (LI-  
117 COR, UK) for one hour at room temperature. Wash steps were repeated prior to  
118 imaging using an Odyssey CLx and protein quantification using Image Studio  
119 software (LI-COR, UK).

120

### 121 ***Behavioural testing***

122 Male and female *Setd1a*<sup>+/-</sup> mice and their wild type (WT) littermates were tested in  
123 adulthood (aged 2-3 months at start of testing). In Cohort 1, 39 males (21 WT and 18  
124 *Setd1a*<sup>+/-</sup>) and 38 females (20 WT and 18 *Setd1a*<sup>+/-</sup>) were tested in the following  
125 order: elevated-plus maze (EPM), open field test (OFT), locomotor activity,  
126 sensorimotor gating, rotarod test, and novel object recognition. All apparatus was  
127 cleaned with 70 % (v/v) ethanol between animals.

128 Cohort 2 was used to test the effects of antipsychotics (haloperidol and risperidone)  
129 on sensorimotor gating impairments observed in Cohort 1. A power calculation  
130 performed on the pre-pulse inhibition data from Cohort 1 showed that a minimum  
131 sample size of 22 was required ( $1 - \beta = 0.8$ ,  $\alpha = .05$ ) for Cohort 2, which comprised  
132 26 males (16 WT and 10 *Setd1a*<sup>+/-</sup>) and 30 females (17 WT and 13 *Setd1a*<sup>+/-</sup>). First,  
133 all mice completed a pre-test session to test whether the basic effects of *Setd1a*  
134 haploinsufficiency were replicated. Then, mice were randomly divided into two  
135 approximately equal groups (balanced for sex and genotype) and allocated to either  
136 the haloperidol or risperidone condition (Table 1).

137

138

139

140 **Table 1.** Number of animals allocated to drug condition in Cohort 2.

|               | Haloperidol |                              | Risperidone |                              |
|---------------|-------------|------------------------------|-------------|------------------------------|
|               | WT          | <i>Setd1a</i> <sup>+/-</sup> | WT          | <i>Setd1a</i> <sup>+/-</sup> |
| <b>Male</b>   | 8           | 5                            | 8           | 5                            |
| <b>Female</b> | 9           | 7                            | 8           | 6                            |
| <b>Total</b>  | 17          | 12                           | 16          | 11                           |

141

142 *Anxiety-related behaviour*

143 The EPM and OFT were used to assess anxiety-related behaviour under identical  
144 lighting conditions (15 lux). Each animals' position in the apparatus during the trial  
145 was determined using EthoVision XT software (Noldus Information Technology,  
146 Netherlands) at a tracking rate of 12 frames per second via a camera mounted  
147 above the apparatus.

148 The EPM was constructed of white Perspex and consisted of four arms of equal size  
149 (175 x 78 mm) extending from a central square region (78 x 78 mm) and positioned  
150 450 mm above the floor. Two of the arms were 'open' (no walls) and two were  
151 enclosed by 150 mm high opaque walls. Arms of the same type were diametrically  
152 opposed. Each animal was placed in the same enclosed arm at the start of the trial  
153 and allowed to explore the apparatus for five minutes. Measures of anxiety were: i)  
154 total distance moved (cm), ii) proportion of time spent on either of the open arms, iii)  
155 latency of first entry into an open arm, and iv) number of entries into the open arms  
156 (summed across both arms).

157 The OFT comprised a 750 x 750 mm arena with 45 cm white Perspex walls. Each  
158 animal was placed in the same corner of the arena and allowed to explore freely for  
159 10 minutes. The arena was divided into two, concentric virtual zones: the 'inner zone'  
160 (central 600 x 600 mm) and the 'outer zone' (surrounding 150 mm). Measures of  
161 anxiety were: i) total distance moved (cm), ii) proportion of time spent in the inner  
162 zone, iii) latency of first entry into the inner zone, and iv) number of entries into the  
163 inner zone.

164

165 *Locomotor activity*

166 Locomotor activity levels were assessed using clear Perspex chambers (210 x 360 x  
167 200 mm) with two transverse infrared beams positioned 30 mm from either end of

168 the chamber and 10 mm above the floor of the chamber. Each animal completed  
169 three 120 minute sessions over consecutive days at the same time of day. The  
170 apparatus was linked to a computer using ARACHNID software (Cambridge  
171 Cognition Ltd., UK). Activity levels were recorded as the number of beam breaks  
172 during each session using a custom programme (BBC BASIC Version 6).

173

#### 174 *Sensorimotor gating*

175 The acoustic startle response (ASR) and pre-pulse inhibition (PPI) were measured  
176 using apparatus from SR-Lab (San Diego Instruments, USA). Animals were placed  
177 in a clear Perspex tube (35 mm internal diameter) mounted on a Perspex plinth in a  
178 sound-attenuating chamber. A 70 dB (A scale) white noise stimulus was  
179 continuously played throughout the session via a loudspeaker positioned 120 mm  
180 above the tube. Each session started with a five minute habituation period. Acoustic  
181 stimuli were presented with a mean intertrial interval of 16 seconds (pseudorandomly  
182 varied between 6 and 24 seconds). Each pulse-alone trial consisted of a 40 ms  
183 acoustic startle stimulus. Pre-pulse trials consisted of a 20 ms acoustic pre-pulse  
184 stimulus followed by a 40 ms acoustic startle stimulus 80 ms after pre-pulse offset.

185 In Cohort 1 and 3, the session was split into three blocks. Pulse amplitude was set to  
186 120 dB and 105 dB (above background) in block 1 and block 2, respectively. In each  
187 block, 6 consecutive 120 dB pulse-alone trials were presented followed by 7  
188 additional pulse-alone trials interspersed with 18 pre-pulse trials (either 4, 8 or 16 dB  
189 (above background) with six trials of each pre-pulse amplitude). The third block  
190 comprised a range of pulse-alone trials (80 – 120 dB (above background) in 10 dB  
191 increments), with three of each trial type. A shortened version of task was used for  
192 Cohort 2. In the basal session, all 4 dB pre-pulse trials and all 105 dB trials were  
193 removed. In the drug experiment, block 3 was also removed from the session. For all  
194 experiments, only the data from 120 dB pulse alone and 8 and 16 dB pre-pulse trials  
195 are reported here for brevity but all raw data are available in the online repository.

196 The whole-body startle response was detected on each trial by a piezoelectric  
197 sensor attached to the plinth, which transduced flexion in the plinth into a digitised  
198 signal. The average startle response ( $V_{avg}$ ) was recorded in arbitrary startle units  
199 using SR-Lab software over the 65 ms period following stimulus onset. Startle data  
200 were weight-adjusted by dividing  $V_{avg}$  by body weight recorded immediately after



201 the test session. PPI was calculated as the percentage reduction in startle amplitude  
202 between pre-pulse and pulse-alone trials (excluding the first three pulse-alone trials).

203

#### 204 *Rotarod test*

205 Motor learning and coordination were assessed using Rotarod 47600 apparatus  
206 (Ugo Basile, Italy) designed for use in mice. The rod (30 mm diameter) was coated  
207 with rubber grooves to provide grip and divided into 570 mm chambers. Each animal  
208 completed five trials across two days (three trials on day one and two trials the next  
209 day). During each 300 second trial, the speed of rotation increased from 5 – 50 rpm  
210 at a constant rate of 0.15 rpm per second. The latency to fall was recorded on each  
211 trial by levers (160 mm below the rod) that caused a timer to stop when triggered by  
212 the animal falling off the rod. On trials where the animal stayed on the rod for the  
213 duration of the trial, the latency to fall was recorded as the maximum trial length.

214

#### 215 *Novel object recognition*

216 Recognition memory was assessed using the novel object recognition (NOR)  
217 paradigm. Testing was conducted under dimmed lighting (15 lux) in a white Perspex  
218 arena (300 x 300 mm) with 300 mm high walls. Prior to testing, mice were habituated  
219 to the empty arena for 10 minutes per day over three consecutive days.

220 Each test session comprised three phases. In the 'habituation phase', mice explored  
221 the empty arena for 10 minutes. Mice were returned to a holding cage while the  
222 experimenter placed two identical objects in diagonally opposite quadrants of the  
223 arena (105 mm from the corner). In the 'acquisition phase', mice were placed back  
224 into the arena and allowed to explore the objects for up to 15 minutes. To control for  
225 potential differences in object neophobia that could contribute to subsequent  
226 memory performance, the total amount of object exploration (defined as when the  
227 animal's head was within 20 mm and oriented towards the object) was timed during  
228 the trial by the experimenter. The acquisition phase was ended once 40 seconds of  
229 object exploration was achieved or the maximum trial length had elapsed. Animals  
230 were then returned to either a holding cage or their home cage for a retention  
231 interval of 30 minutes or 24 hours. In the 'test phase', mice were placed back in the  
232 arena with one of the objects that they had been exposed to during the acquisition  
233 phase ('familiar') and another object that had not been encountered previously  
234 ('novel'). The objects were presented in the same locations as the acquisition phase.



235 Animals were allowed to explore freely for five minutes and the amount of familiar  
236 and novel object exploration was recorded manually via the keyboard by the  
237 experimenter using EthoVision XT software (Noldus Information Technology,  
238 Netherlands). A discrimination ratio was calculated by dividing the amount of time  
239 the animal spent exploring the novel object by the total amount of object exploration  
240 (novel and familiar summed).

241 All animals completed the experiment at both the 30 minute and 24 hour retention  
242 interval, with order counterbalanced across animals and at least 24 hours between  
243 each condition. For the second test session, new objects that had not been  
244 encountered previously were placed in the quadrants of the arena that were  
245 unoccupied in the previous session. Location of the objects and allocation of objects  
246 to retention interval were counterbalanced across animals.

247

#### 248 ***Drug preparation and administration***

249 Haloperidol (Sigma, UK) and risperidone (Sigma, UK) were initially dissolved in 1M  
250 glacial acetic acid and then diluted in 0.9 % saline such that an equal volume (100  
251  $\mu$ L per gram of body weight) was administered for each injection. Drugs were  
252 administered by intraperitoneal injection with a 30 minute pre-treatment delay before  
253 the sensorimotor gating test. All animals completed three sessions (vehicle, 0.5  
254 mg/kg and 1.0 mg/kg) with seven days washout between sessions. These dosages  
255 were selected based on pilot dose-response data showing that a 0.5 mg/kg dose of  
256 either haloperidol or risperidone did not have significant effects on sensorimotor  
257 gating in WT C57BL/6J mice (Figure S1). At 1.0 mg/kg, haloperidol caused a  
258 significant increase in PPI and risperidone caused a significant reduction in the ASR.  
259 Therefore, 0.5 mg/kg was selected as a sub-threshold dose to explore drug effects in  
260 *Setd1a*<sup>+/-</sup> mice in the absence of non-specific effects of the drugs on sensorimotor  
261 gating that occur in WT mice. Dose order was counterbalanced across animals for  
262 vehicle and 0.5 mg/kg. All mice received the 1.0 mg/kg dose in the final session to  
263 explore drug effects at a dose that was known to affect sensorimotor gating in WT  
264 animals to rule out the possibility that the lack of effect in *Setd1a*<sup>+/-</sup> mice was due to  
265 an insufficient dose of drug.

266

267

268

## 269 **Data analysis**

270 All data are available at: <https://osf.io/gt7ew/>. Data were analysed using IBM SPSS  
271 software (version 25). *Setd1a* expression levels (mRNA and protein) in E13.5 brain  
272 were analysed using independent samples t-tests (*Setd1a*<sup>+/-</sup>). The between-subjects  
273 factors of genotype and sex were included in analyses of all behavioural data. Data  
274 from the EPM and OFT were analysed using MANOVA with four dependent  
275 variables; distance moved, proportion of time spent in anxiogenic region, latency of  
276 first entry into the anxiogenic region (log transformed to remove positive skew), and  
277 number of entries into the anxiogenic region. Locomotor activity data were analysed  
278 using a mixed ANOVA with day as a within-subjects factor. ASR data were analysed  
279 using ANOVA with sex and genotype as between-subjects factors. PPI data were  
280 analysed using a mixed ANOVA with pre-pulse amplitude (8 dB and 16 dB) as a  
281 within-subjects factor. The additional within-subjects factor of drug condition (vehicle,  
282 0.5 mg/kg and 1.0 mg/kg) was included in the model for analysis of the  
283 pharmacological challenge experiment. Rotarod data were analysed using a mixed  
284 ANOVA with the within-subjects factor of trial number (5 levels). NOR data were  
285 analysed using a mixed ANOVA with the within-subjects factor of retention interval  
286 (30 minutes and 24 hours). Data from one male WT subject (Cohort 1) were missing  
287 for NOR due to a technical issue during testing. Data from one female WT animal  
288 (Cohort 3) were excluded from analysis of the OFT because it was identified as a  
289 multivariate outlier. Greenhouse Geisser corrected results are reported for locomotor  
290 activity and the Rotarod test because a significant Mauchly's test result indicated that  
291 the assumption of sphericity had been violated.

292

## 293 **RESULTS**

### 294 **Confirmation of *Setd1a* haploinsufficiency in the *Setd1a*<sup>+/-</sup> model**

295 *Setd1a* mRNA expression was reduced by 48.8 % in *Setd1a*<sup>+/-</sup> brain at E13.5  
296 compared to WTs ( $t(14) = 9.18$ ,  $p < .001$ ; Figure 1A). Consistent with this, levels of  
297 SETD1A protein were also reduced by 46.3 % ( $t(8) = 2.71$ ,  $p = .03$ ; Figure 1B). This  
298 magnitude of reduction is consistent with haploinsufficiency and confirms that *Setd1a*  
299 knockdown to half of WT levels was successfully achieved.

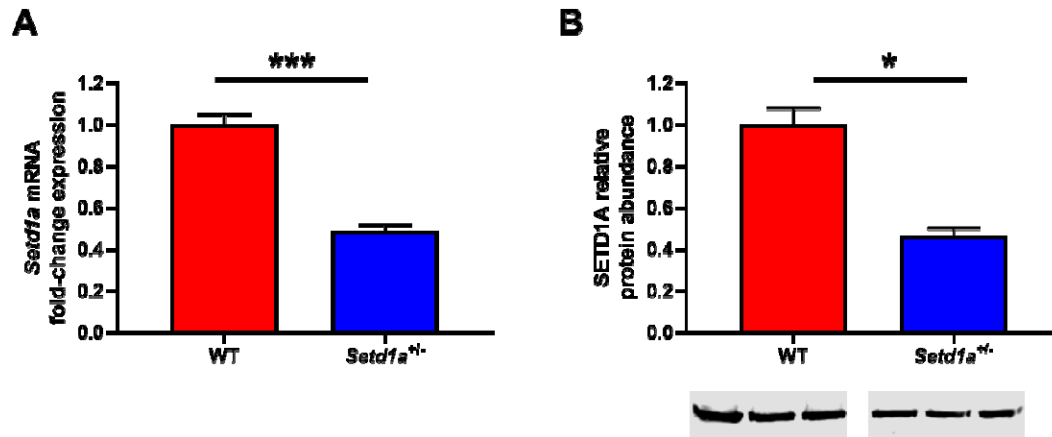

300

301 **Figure 1. Reduced *Setd1a* dosage in E13.5 *Setd1a*<sup>+/-</sup> brain.** Mean ( $\pm$  SEM) fold-  
302 exchange expression (relative to WT) **A)** *Setd1a* mRNA (N = 8 per genotype) and **B)**  
303 SETD1A protein abundance (N = 5 per genotype).  
304

305 ***Setd1a*<sup>+/-</sup> mice show increased anxiety-related behaviour in the OFT but not the**  
306 **EPM**

307 Analysis of the EPM data revealed a significant multivariate effect of genotype ( $F(4,$   
308  $70) = 2.52, p = .049, \text{Wilk's } \lambda = 0.87$ ). However, univariate follow-up analyses  
309 revealed no significant effects of genotype for total distance moved ( $p = .99$ ; Figure  
310 2A), proportion of time on the open arms ( $p = .75$ ; Figure 2B), log latency of first  
311 entry into one of the open arms ( $p = .06$ ; Figure 2C) or number of entries into the  
312 open arms ( $p = .20$ ; Figure 2D). There was no significant multivariate effect of sex  
313 ( $F(4, 70) = 1.39, p = .25, \text{Wilk's } \lambda = 0.93$ ) and no interaction between genotype and  
314 sex ( $F(4, 70) = 1.33, p = .27, \text{Wilk's } \lambda = 0.93$ ).

315

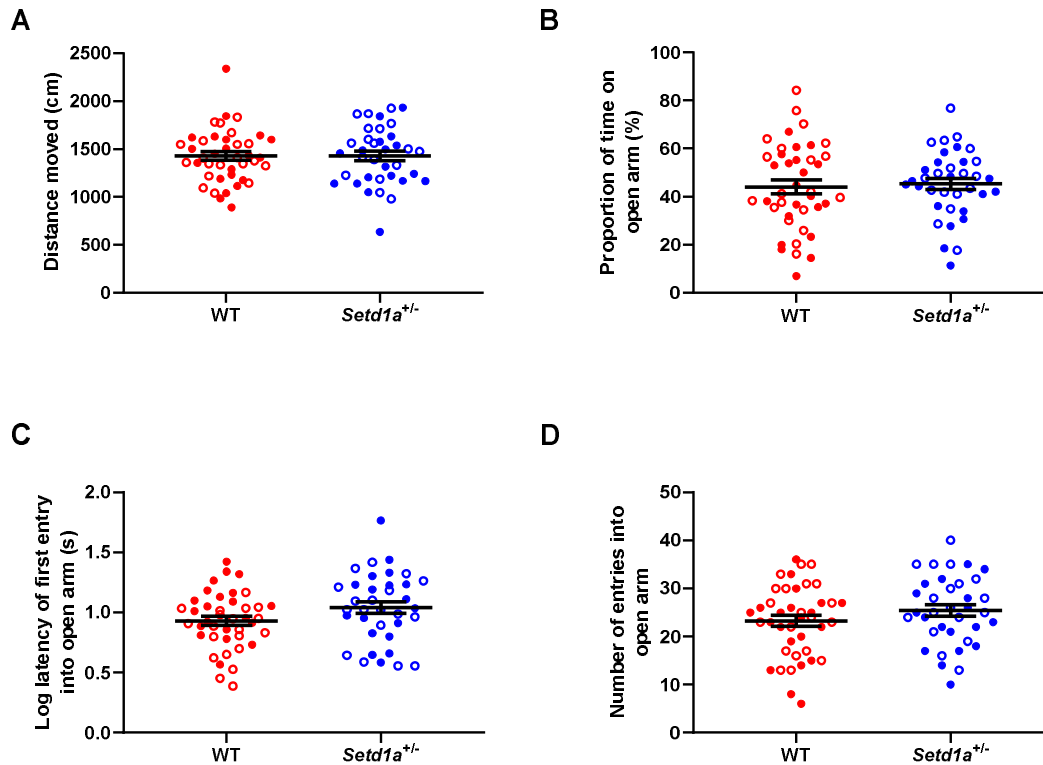

316

317 **Figure 2. *Setd1a*<sup>+/-</sup> mice do not show increased anxiety-related behaviour on**  
318 **the EPM. Mean ( $\pm$  SEM) A) distance moved (cm), B) proportion of time spent on the**  
319 **open arm (%), C) log latency of first entry into an open arm (s), and D) number of**  
320 **entries into an open arm. Males = filled symbols and females = open symbols.**  
321

322 Analysis of the data from the OFT revealed a significant multivariate effect of  
323 genotype ( $F(4, 70) = 3.43, p = .01, \text{Wilk's } \lambda = 0.84$ ). Follow-up univariate analyses  
324 revealed that, compared to their WT littermates, *Setd1a*<sup>+/-</sup> mice made significantly  
325 fewer entries into the inner zone ( $p = .04$ ; Figure 3D) and spent significantly less time  
326 in this region ( $p = .02$ ; Figure 3B). There were no differences between *Setd1a*<sup>+/-</sup> and  
327 WT mice in the total distance moved during the test ( $p = .11$ ; Figure 3A) or log  
328 latency of first entry into the inner zone ( $p = .18$ ; Figure 3C). There was no significant  
329 multivariate effect of sex ( $F(4, 70) = 1.31, p = .27, \text{Wilk's } \lambda = 0.93$ ) or interaction  
330 between sex and genotype ( $F(4, 70) = 0.13, p = .97, \text{Wilk's } \lambda = 0.99$ ), indicating that  
331 both male and female *Setd1a*<sup>+/-</sup> mice showed increased anxiety-related behaviour in  
332 the OFT.

333

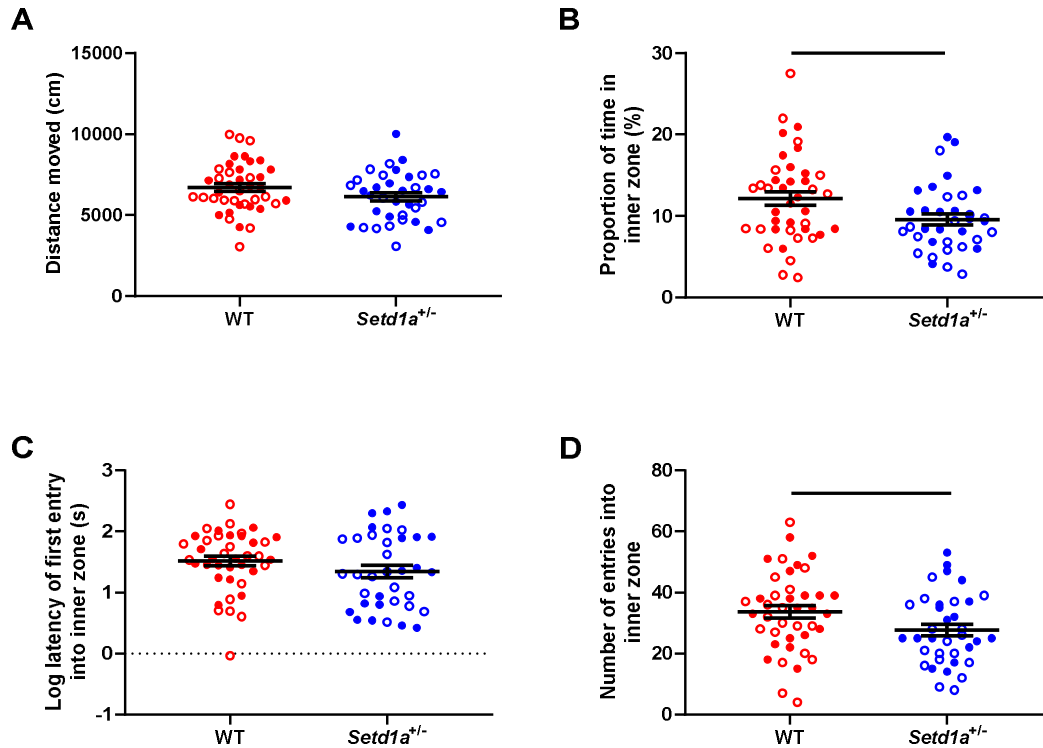

334  
335  
336  
337  
338  
339

**Figure 3. *Setd1a*<sup>+/-</sup> mice show increased anxiety-related behaviour in the OFT.** Mean ( $\pm$  SEM) **A**) distance moved (cm), **B**) proportion of time spent in the inner zone (%), **C**) log latency of first entry into the inner zone (s), and **D**) number of entries into the inner zone. Males = filled symbols and females = open symbols. \*  $p < .05$ .

340 **Locomotor activity levels, motoric function, and novel object recognition are**  
341 **not altered in *Setd1a*<sup>+/-</sup> mice**

342 Locomotor activity levels were assessed as the number of beam breaks made over  
343 three consecutive days (Figure 4A). The number of beam breaks made by *Setd1a*<sup>+/-</sup>  
344 mice was not significantly different from WT ( $F(1, 73) = 0.46, p = .50$ ), indicating no  
345 effect of *Setd1a* haploinsufficiency on locomotor activity levels. Moreover, there was  
346 a significant main effect of day ( $F(1.69, 123.08) = 28.63, p < .001$ ) and no significant  
347 interaction between day and genotype ( $F(1.69, 123.09) = 0.18, p = .80$ ). This shows  
348 that the degree of habituation of locomotor activity levels across days was equivalent  
349 in *Setd1a*<sup>+/-</sup> and WT mice. There was also no significant main effect of sex ( $F(1, 73)$   
350  $= 0.40, p = .84$ ). No significant interactions were observed between sex and  
351 genotype ( $F(1, 73) = 2.45, p = .12$ ) or between genotype, day, and sex ( $F(1.69,$   
352  $123.09) = 0.62, p = .92$ ). These results show that both male and female *Setd1a*<sup>+/-</sup>

353 mice show normal locomotor activity levels and habituation of activity levels across  
354 test sessions.

355 Assessment of motor coordination using the Rotarod test (Figure 4B) revealed that  
356 the latency to fall over five accelerating trials was not significantly different between  
357 *Setd1a*<sup>+/-</sup> and WT mice ( $F(1, 73) = 2.70, p = .11$ ). A significant main effect of trial was  
358 observed ( $F(2.97, 217.0) = 16.99, p < .001$ ), indicating that the latency to fall  
359 increased with training. There was no significant interaction between genotype and  
360 trial ( $F(2.97, 217.0) = 0.50, p = .68$ ), which shows that motor learning was not  
361 impaired in *Setd1a*<sup>+/-</sup> mice. There was also no significant main effect of sex ( $F(1, 73)$   
362  $= 0.33, p = .57$ ) and no significant interaction between sex and genotype ( $F(1, 73) =$   
363  $0.001, p = .98$ ). The three way interaction between genotype, sex, and trial was also  
364 not significant ( $F(2.97, 217.0) = 2.41, p = .07$ ). These data indicate normal motor  
365 coordination and motor learning in male and female *Setd1a*<sup>+/-</sup> mice.

366 Novel object recognition memory performance was assessed after a 30 minute and  
367 24 hour retention interval (Figure 4C). As expected, discrimination ratios were higher  
368 after 30 minutes compared to 24 hours ( $F(1, 72) = 19.61, p < .001$ ). There was no  
369 significant main effect of genotype ( $F(1, 72) = 0.05, p = .82$ ) and no interaction  
370 between genotype and retention interval ( $F(1, 72) = 1.68, p = .20$ ). There was also  
371 no significant main effect of sex ( $F(1, 72) = 0.32, p = .57$ ), no interaction between sex  
372 and genotype ( $F(1, 72) = 0.45, p = .51$ ) or between sex, genotype and delay ( $F(1,$   
373  $72) = 0.59, p = .45$ ). These findings indicate intact short- and long-term object  
374 recognition memory in both male and female *Setd1a*<sup>+/-</sup> mice.

375

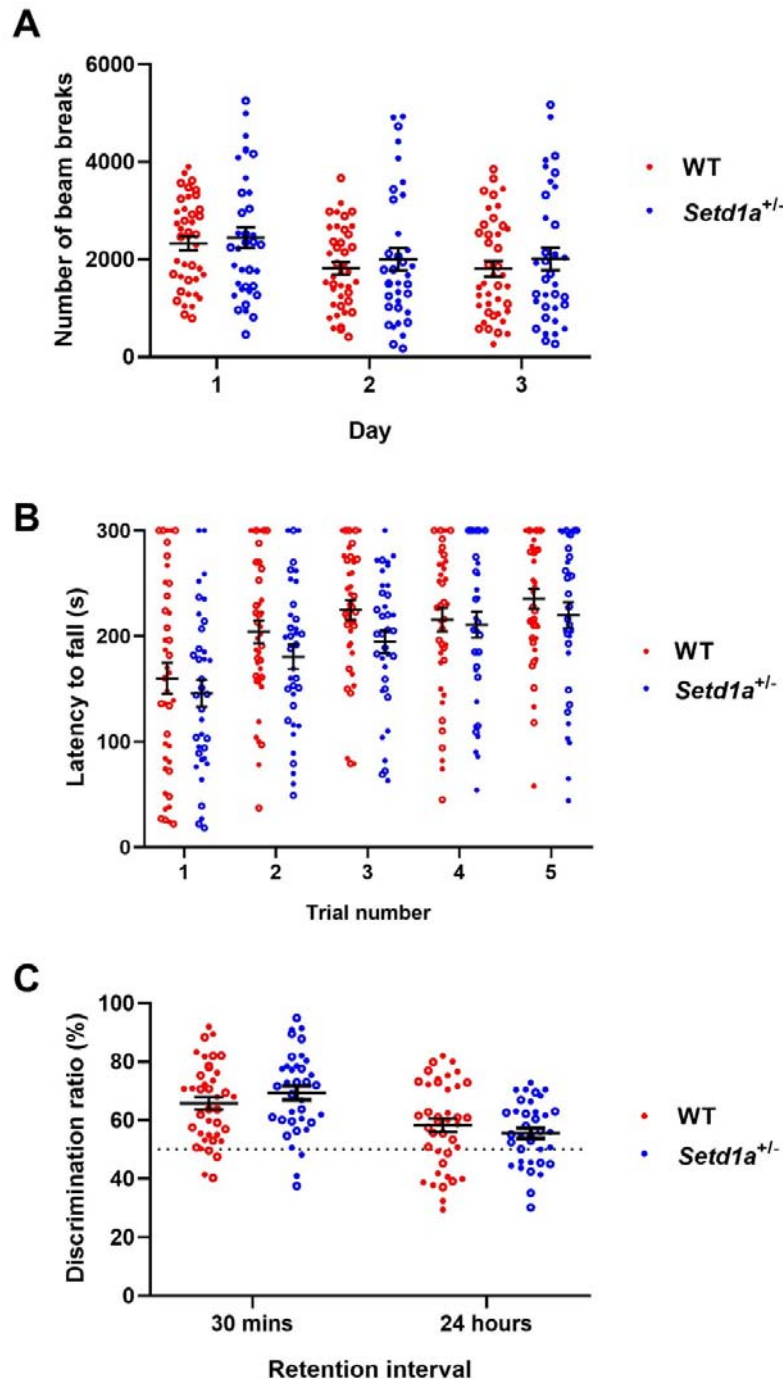

376

377 **Figure 4. *Setd1a*<sup>+/-</sup> mice show normal locomotor activity levels, motoric**  
378 **function, and novel object recognition memory.** Mean ( $\pm$  SEM) **A)** number of  
379 beam breaks recorded in locomotor activity chambers during two hour sessions over  
380 three consecutive days, **B)** latency to fall (seconds) over five accelerating Rotarod  
381 trials, and **C)** novel object discrimination ratios (%) at 30 minute and 24 hour  
382 retention intervals (dotted line shows chance performance). Males = filled symbols  
383 and females = open symbols.  
384



385 ***Setd1a*<sup>+/-</sup> mice show an elevated acoustic startle response and diminished pre-**  
386 **pulse inhibition**

387 The ASR was measured in response to a 120 dB (above background) acoustic  
388 stimulus (Figure 5A). A significant main effect of genotype was observed ( $F(1, 73) =$   
389  $5.35, p = .02$ ), indicating that the magnitude of ASR was significantly greater in  
390 *Setd1a*<sup>+/-</sup> mice compared to WTs. The main effect of sex was not significant ( $F(1, 73)$   
391  $= 3.25, p = .08$ ) and there was no significant interaction between sex and genotype  
392 ( $F(1, 73) = 1.98, p = .16$ ). This shows that the hyperstartling effect of *Setd1a*  
393 haplosufficiency was consistent in males and females.

394 PPI of the 120 dB ASR was assessed in response to an 8 dB and 16 dB (above  
395 background) pre-pulse stimulus (Figure 5B). A significant main effect of pre-pulse  
396 amplitude was observed ( $F(1, 73) = 253.07, p < .001$ ) indicating that the magnitude  
397 of PPI was greater in response to the louder pre-pulse stimuli. There was a  
398 significant main effect of genotype ( $F(1, 73) = 26.64, p < .001$ ) and no significant  
399 interaction between genotype and pre-pulse amplitude ( $F(1, 73) = 2.00, p = .16$ ),  
400 indicating reduced PPI in *Setd1a*<sup>+/-</sup> mice relative to WTs at both pre-pulse  
401 amplitudes. There was no significant main effect of sex ( $F(1, 73) = 2.62, p = .11$ ), or  
402 interaction between sex and genotype ( $F(1, 73) = 1.98, p = .16$ ) or sex, genotype,  
403 and pre-pulse amplitude ( $F(1, 73) = 0.001, p = .97$ ). These results demonstrate that  
404 PPI of the ASR was reduced at both pre-pulse amplitudes in male and female  
405 *Setd1a*<sup>+/-</sup> mice.

406

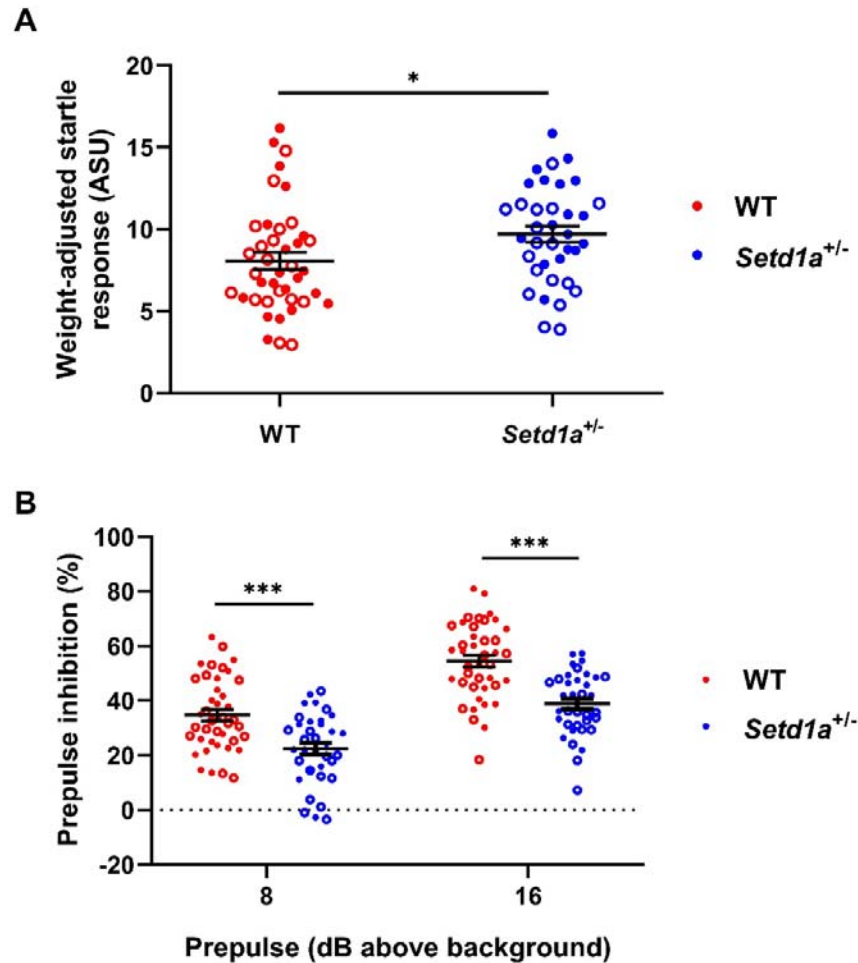

407

408 **Figure 5. *Setd1a*<sup>+/-</sup> mice show an elevated ASR and reduced PPI of the ASR.**  
409 Mean ( $\pm$  SEM) **A**) weight-adjusted ASR (arbitrary startle units) evoked by a 120 dB  
410 (above background) acoustic stimulus and **B**) percentage reduction of the ASR by an  
411 8 dB and 16 dB (above background) pre-pulse stimulus. Males = filled symbols and  
412 females = open symbols. \*  $p < .05$ , \*\*\*  $p < .001$ .

413

414 **Aberrant sensorimotor gating in *Setd1a*<sup>+/-</sup> mice cannot be rescued by**  
415 **haloperidol or risperidone**

416 Prior to the drug challenge experiment, the effects of *Setd1a* haploinsufficiency on  
417 sensorimotor gating were re-examined in an independent batch of animals (Cohort  
418 2). This pre-test session revealed a significant main effect of genotype on ASR ( $F(1,$   
419  $52) = 15.58$ ,  $p < .001$ ; Figure 6A) and PPI ( $F(1, 52) = 15.58$ ,  $p < .001$ ; Figure 6B).  
420 This indicates that the observation of increased ASR and reduced PPI in *Setd1a*<sup>+/-</sup>  
421 mice was robust and could be replicated in a separate cohort.

422 In the animals that received haloperidol, there was a significant main effect of  
423 genotype on ASR ( $F(1, 25) = 14.01$ ,  $p = .001$ ; Figure 6C). There was no significant

424 interaction between genotype and dose ( $F(2, 50) = 1.72, p = .19$ ), indicating that the  
425 elevated startle response in *Setd1a*<sup>+/-</sup> mice was not normalised by haloperidol. There  
426 was a significant main effect of genotype on PPI ( $F(1, 25) = 21.92, p < .001$ ; Figure  
427 6D), which was qualified by a significant interaction between sex and genotype ( $F(1,$   
428  $25) = 9.16, p = .01$ ). Simple effects post-hoc tests revealed that the main effect of  
429 genotype was significant in females ( $F(1, 25) = 33.86, p < .01$ ) but not males ( $F(1,$   
430  $25) = 1.22, p = .28$ ). In addition, WT females showed significantly greater PPI than  
431 WT males ( $F(1, 25) = 6.26, p = .02$ ) but there was no significant sex difference in  
432 *Setd1a*<sup>+/-</sup> mice ( $F(1, 25) = 3.45, p = .08$ ). The main effect of dose was not significant  
433 ( $F(2, 50) = 3.08, p = .06$ ) but indicated a dose-related increase in PPI. However, the  
434 interaction between dose and genotype was not significant ( $F(2, 50) = 0.02, p = .98$ ).  
435 This shows that the non-significant enhancement of PPI by haloperidol occurred in  
436 both WT and *Setd1a*<sup>+/-</sup> mice, rather than restoring PPI of *Setd1a*<sup>+/-</sup> mice to WT  
437 levels.

438 In the risperidone group, there was a significant main effect of genotype on ASR  
439 ( $F(1, 23) = 63.38, p < .001$ ; Figure 6E). A significant main effect of dose was  
440 observed ( $F(2, 46) = 25.25, p < .001$ ) and this was qualified by a significant three  
441 way interaction between dose, genotype, and sex ( $F(2, 46) = 5.51, p = .01$ ). In  
442 males, the main effect of dose ( $F(2, 22) = 7.32, p = .004$ ) was qualified by a  
443 significant interaction between dose and genotype ( $F(2, 22) = 6.26, p = .01$ ).  
444 Bonferroni-corrected pairwise comparisons revealed a dose-dependent reduction of  
445 ASR in WT (relative to vehicle  $p = .05$  at 0.5 mg/kg and  $p = .01$  at 1.0 mg/kg) but not  
446 *Setd1a*<sup>+/-</sup> males (relative to vehicle  $p = .62$  at 0.5 mg/kg and  $p = .42$  at 1.0 mg/kg).  
447 Conversely, in females the main effect of dose was significant ( $F(2, 24) = 23.09, p <$   
448  $.001$ ) but there was no interaction between genotype and dose ( $F(2, 24) = 1.32, p =$   
449  $.29$ ). These findings suggest that the startle-inhibiting effect of risperidone was  
450 reduced in male (but not female) *Setd1a*<sup>+/-</sup> mice (Figure S2). There was also a  
451 significant main effect of genotype on PPI ( $F(1, 23) = 6.36, p = .02$ ; Figure 6F) and  
452 no significant interaction between genotype and sex ( $F(1, 23) = 0.24, p = .63$ ). The  
453 main effect of dose was not significant ( $F(2, 46) = 2.71, p = .08$ ) and there was no  
454 interaction between genotype and dose ( $F(2, 46) = 1.38, p = .26$ ). These findings  
455 show that deficient PPI in *Setd1a*<sup>+/-</sup> mice was not be rescued by risperidone.

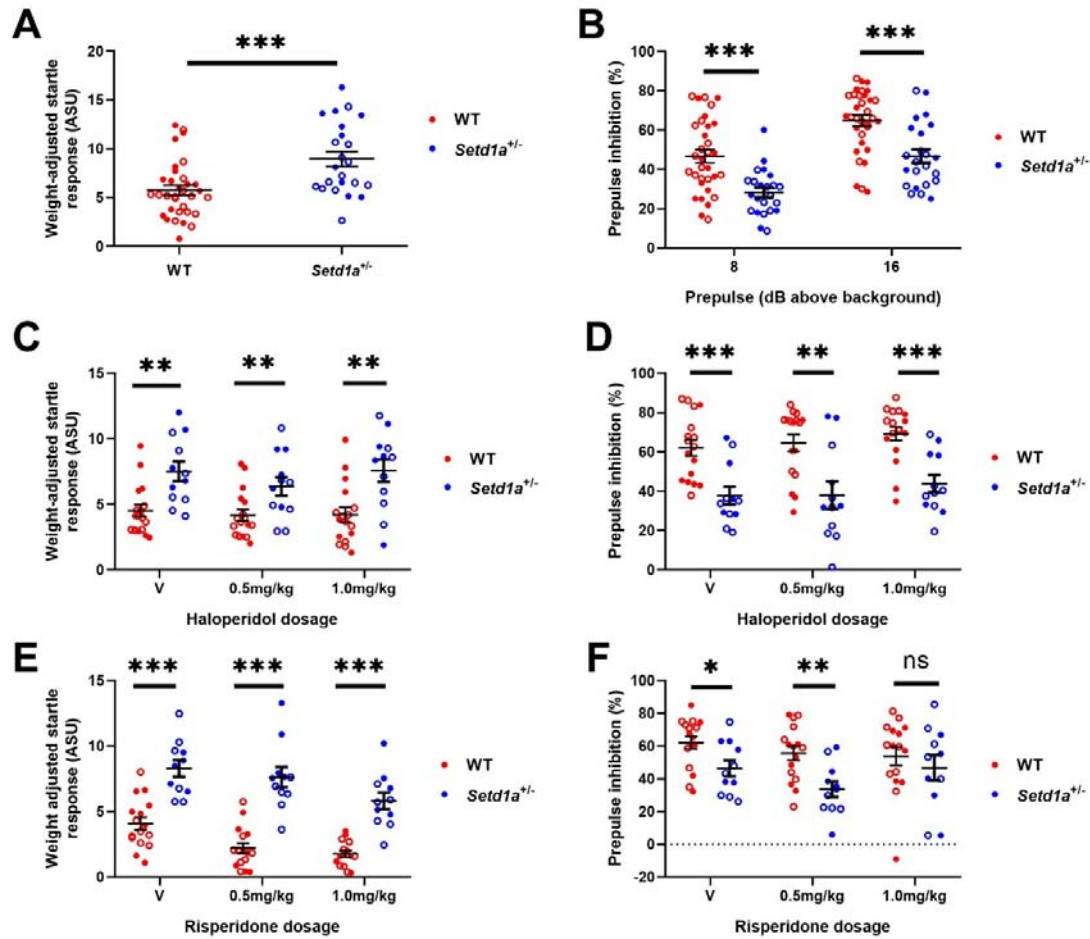

456

457

458 **Figure 6. Abnormal sensorimotor gating in *Setd1a*<sup>+/-</sup> mice is not rescued by**

459 **haloperidol or risperidone. A)** weight-adjusted ASR at 120 dB (above background) and **B)**

460 **pre-pulse inhibition (%) by an 8 dB and 16 dB (above background) pre-pulse**

461 **stimulus under basal conditions in the pre-test session. C)** ASR and **D)** PPI

462 **(averaged across 8 dB and 16 dB pre-pulse) following intraperitoneal injection with**

463 **vehicle, 0.5 mg/kg, and 1.0mg/kg haloperidol. E)** ASR and **F)** PPI (averaged across

464 **8 dB and 16 dB pre-pulse) following intraperitoneal injection with vehicle, 0.5 mg/kg,**

465 **and 1.0mg/kg risperidone. All data are mean ( $\pm$  SEM). Males = filled symbols and**

465 **females = open symbols. \*  $p < .05$ , \*\*  $p < .01$ , \*\*\*  $p < .001$ .**

## 466 **DISCUSSION**

467 Here, we examined the behavioural consequences of haploinsufficiency of the  
468 schizophrenia candidate gene *Setd1a* in a mouse model. We find evidence for  
469 changes in a number of phenotypes of relevance to schizophrenia, including  
470 increased anxiety-related behaviour, enhanced acoustic startle response, and  
471 decreased pre-pulse inhibition of acoustic startle. These sensorimotor gating deficits  
472 could not be rescued by haloperidol or risperidone, suggesting that these  
473 antipsychotics are ineffective for ameliorating schizophrenia-relevant phenotypes in  
474 *Setd1a*<sup>+/-</sup> mice and point to deficits in neural systems other than the monoamine  
475 system. Taken together these data strengthen the support for the use of *Setd1a*  
476 haploinsufficient mice as a model for the biological basis of schizophrenia, and point  
477 towards possible underpinning neural mechanisms.

478 We have developed and characterised a new *Setd1a*<sup>+/-</sup> mouse model. After  
479 demonstrating that *Setd1a* haploinsufficiency led to a robust ~50% reduction in  
480 *Setd1a* protein levels, we characterised a number of behavioural phenotypes of  
481 relevance to neurodevelopmental disorders and schizophrenia in a large  
482 experimental cohort of both sexes. We measured anxiety using two separate tests,  
483 but only found changes, specifically increased anxiety, in the open field test, with  
484 behaviour on the elevated plus maze being equivalent to wild-type littermates. The  
485 reduced time spent in the centre of the open field is not due to generalised effects on  
486 activity, as *Setd1a*<sup>+/-</sup> mice showed equivalent behaviour on a simple locomotor  
487 activity test and on the Rotarod. These data therefore suggest a subtle, but specific  
488 deficit in anxiety. This contrasts with a previous study of a similar *Setd1a*<sup>+/-</sup> mouse  
489 model that showed no difference in the open field test (21). However, we note that  
490 these authors used a much longer test time (60 minutes) which may mask a subtle  
491 anxiety phenotype as demonstrated here.

492 Perhaps surprisingly our *Setd1a*<sup>+/-</sup> mouse model did not show any deficits on the  
493 novel object test of learning and memory. In contrast, memory deficits have been  
494 demonstrated in a both mouse (22) and *Drosophila* (6) models of *Setd1a* LoF  
495 mutations. Nevertheless, Mukai et al (21) also did not see any deficits on the novel  
496 object test using a *Setd1a* haploinsufficient mouse model very similar to ours.  
497 Moreover, the deficits seen in the Nagahama et al (22) study affected only one test  
498 point in the novel object recognition test (1 hour, but not 24 hours), possibly

499 indicating a subtle phenotype that is subsumed by the difference between their  
500 model, and the ones used here and by Mukai et al. (21).

501 One the most robust behavioural abnormalities found in the *Setd1a*<sup>+/-</sup> mice were  
502 seen in measures of sensorimotor gating. Two separate cohorts demonstrated  
503 enhanced acoustic startle response (ASR) and reduced pre-pulse inhibition of the  
504 ASR. It is unsurprising therefore that our observation of sensorimotor deficits is  
505 supported by other studies of models of *Setd1a* LoF mutations showing similar  
506 changes in pre-pulse inhibition (22) and abnormalities in the neural circuitry  
507 underlying information processing (26). Deficits in attention and gating, or filtering out  
508 intrusive stimuli are prominent features shared by both psychiatric and  
509 developmental disorders (26, 27), with which haploinsufficiency of *SETD1A* is  
510 associated (4, 6, 7). These are also emerging as key features of a number of other  
511 rare neurodevelopmental disorders caused by LoF mutations in genes encoding  
512 epigenome writers, readers and erasers. For instance, mouse models  
513 haploinsufficient for the histone methyltransferase *Ehmt1* (Glp), which is linked to  
514 Kleefstra syndrome, also show deficits in sensorimotor gating and information  
515 processing across a number of different studies (28-31). This could suggest these  
516 genes act in a network to modulate brain development, with common transcriptional  
517 targets and/or by regulating each other. This idea is supported by recent RNA-seq  
518 evidence from another mouse model demonstrating that *Setd1a*<sup>+/-</sup> haploinsufficiency  
519 leads to differentially expressed genes in the mPFC enriched for genes associated  
520 with neurodevelopmental disease and schizophrenia, including, for instance, *Ehmt1*  
521 (22).

522 In light of the changes in acoustic startle response and pre-pulse inhibition of startle  
523 seen in our *Setd1a* haploinsufficient model we decided to test whether these  
524 sensorimotor gating deficits could be rescued by administering commonly used  
525 antipsychotic drugs, namely haloperidol and risperidone. Although both anti-  
526 psychotics have previously been shown to reverse PPI deficits in several rodent  
527 models of schizophrenia (32), generally neither rescued the sensorimotor gating  
528 deficits seen in the *Setd1a*<sup>+/-</sup> mice. However, there was an interesting difference in  
529 the effectiveness of risperidone between male and female *Setd1a*<sup>+/-</sup> mice, with no  
530 attenuation of startle response in males. Whether this is a real difference needs  
531 further testing, particularly as numbers for these experiments were low. Despite this  
532 possible sex difference, generally these data suggest that the neurobiological



533 changes that cause deficient PPI in *Setd1a*<sup>+/-</sup> mice are not appropriately targeted by  
534 either haloperidol (mainly dopaminergic) or risperidone (mainly serotonergic). This  
535 could indicate that the monoamine circuitry remains largely intact in the *Setd1a*<sup>+/-</sup>  
536 mice, and that baseline behavioural changes are caused by changes in other neural  
537 systems. Of particular relevance here is that the Nagahama et al (22) report that  
538 glutamate release probability is reduced when *Setd1a* is knocked down in  
539 postsynaptic pyramidal neurons. Future studies should investigate the ability of  
540 glutamatergic drugs in ameliorating the behavioural deficits seen in our *Setd1a*  
541 haploinsufficiency model.

542

543 Overall, these data add to our growing understanding of the role of *Setd1a* in brain  
544 and behaviour. Our findings, coupled with those from others investigating different  
545 *Setd1a* models, demonstrate replicable common phenotypes of relevance that could  
546 be used for the development and testing of therapies in rescue studies. Moreover,  
547 the shared deficits seen in other mouse models of LoF mutations may be indicative  
548 of shared mechanisms between different genes encoding epigenome modifiers.

549

#### 550 **Data Availability**

551 All data are publicly available at the following 'Open Science Framework' link:  
552 <https://osf.io/qt7ew/>

553

#### 554 **Funding**

555 This work was supported by a Wellcome Trust Integrative Neuroscience PhD grant  
556 (109084/Z/15/Z) and an A. Bruce Naylor Memorial Early Career Research  
557 Fellowship from The Waterloo Foundation awarded to MLB; UKRI Medical Research  
558 Council (MRC) IMPC: Pump Priming Award (MR/P026176/1) awarded to ARI, LSW  
559 and TH; ARI and LSW are members of the MRC Centre for Neuropsychiatric  
560 Genetics and Genomics (MR/L010305/1).

561

#### 562 **Author contribution**

563 MLB, ARI, LSW and TH conceived the project. MLB and TH planned the behavioural  
564 experiments, all of which were performed by MLB; Tissue collection, processing and  
565 analysis was performed by MLB, with input from ARI. MLB wrote the paper, with  
566 editing input from ARI, LSW and TH.



567

568

569

## 570 **Acknowledgements**

571 The C57BL/6NTac-Setd1a<sup>tm1a(EUCOMM)Wtsi</sup>/WtsiCnrm mouse strain was originally  
572 created by KOMP using ES cell clone generated by the Wellcome Trust Sanger  
573 Institute and distributed by EMMA. Subsequent FLPo deletion to create the  
574 C57BL/6NTac-Setd1a<sup>tm1c(EUCOMM)Wtsi</sup>/WtsiCnrm allele was conducted at the MRC  
575 Harwell Institute.

576

## 577 **REFERENCES**

- 578 1 Singh, T., Neale, B.M., Daly, M.J. (2020) Exome sequencing identifies rare coding  
579 variants in 10 genes which confer substantial risk for schizophrenia. *medRxiv*, in press.,  
580 2020.2009.2018.20192815.
- 581 2 Howrigan, D.P., Rose, S.A., Samocha, K.E., Fromer, M., Cerrato, F., Chen, W.J.,  
582 Churchhouse, C., Chambert, K., Chandler, S.D., Daly, M.J. *et al.* (2020) Exome  
583 sequencing in schizophrenia-affected parent-offspring trios reveals risk conferred by  
584 protein-coding de novo mutations. *Nat Neurosci*, **23**, 185-193.
- 585 3 Lescai, F., Grove, J., Satterstrom, F.K., Rees, E., Bybjerg-Grauholm, J., Als, T.D.,  
586 Kalinowski, J., Halager, A., Singh, T., Li, Q. *et al.* (2019) Meta-analysis of Scandinavian  
587 Schizophrenia Exomes. *bioRxiv*, in press., 836957.
- 588 4 Singh, T., Kurki, M.I., Curtis, D., Purcell, S.M., Crooks, L., McRae, J., Suvisaari, J.,  
589 Chheda, H., Blackwood, D., Breen, G. *et al.* (2016) Rare loss-of-function variants in  
590 SETD1A are associated with schizophrenia and developmental disorders. *Nat Neurosci*,  
591 **19**, 571-577.
- 592 5 Takata, A., Xu, B., Ionita-Laza, I., Roos, J.L., Gogos, J.A. and Karayiorgou, M. (2014)  
593 Loss-of-function variants in schizophrenia risk and SETD1A as a candidate susceptibility  
594 gene. *Neuron*, **82**, 773-780.
- 595 6 Kummeling, J., Stremmelaar, D.E., Raun, N., Reijnders, M.R.F., Willemsen, M.H.,  
596 Ruiterkamp-Versteeg, M., Schepens, M., Man, C.C.O., Gilissen, C., Cho, M.T. *et al.*  
597 (2021) Characterization of SETD1A haploinsufficiency in humans and Drosophila  
598 defines a novel neurodevelopmental syndrome. *Mol Psychiatry*, **26**, 2013-2024.
- 599 7 Eising, E., Carrion-Castillo, A., VINO, A., Strand, E.A., Jakielski, K.J., Scerri, T.S.,  
600 Hildebrand, M.S., Webster, R., Ma, A., Mazoyer, B. *et al.* (2019) A set of regulatory  
601 genes co-expressed in embryonic human brain is implicated in disrupted speech  
602 development. *Mol Psychiatry*, **24**, 1065-1078.
- 603 8 Yu, X., Yang, L., Li, J., Li, W., Li, D., Wang, R., Wu, K., Chen, W., Zhang, Y., Qiu, Z. *et*  
604 *al.* (2019) De Novo and Inherited SETD1A Variants in Early-onset Epilepsy. *Neurosci*  
605 *Bull*, **35**, 1045-1057.
- 606 9 Shilatifard, A. (2012) The COMPASS family of histone H3K4 methylases: mechanisms  
607 of regulation in development and disease pathogenesis. *Annu Rev Biochem*, **81**, 65-95.
- 608 10 Tajima, K., Matsuda, S., Yae, T., Drapkin, B.J., Morris, R., Boukhali, M., Niederhoffer,  
609 K., Comaills, V., Dubash, T., Nieman, L. *et al.* (2019) SETD1A protects from  
610 senescence through regulation of the mitotic gene expression program. *Nat Commun*,  
611 **10**, 2854.
- 612 11 Hoshii, T., Cifani, P., Feng, Z., Huang, C.H., Koche, R., Chen, C.W., Delaney, C.D.,  
613 Lowe, S.W., Kentsis, A. and Armstrong, S.A. (2018) A Non-catalytic Function of

- 614 SETD1A Regulates Cyclin K and the DNA Damage Response. *Cell*, **172**, 1007-1021  
615 e1017.
- 616 12 Tajima, K., Yae, T., Javaid, S., Tam, O., Comaills, V., Morris, R., Wittner, B.S., Liu, M.,  
617 Engstrom, A., Takahashi, F. *et al.* (2015) SETD1A modulates cell cycle progression  
618 through a miRNA network that regulates p53 target genes. *Nat Commun*, **6**, 8257.
- 619 13 Sze, C.C., Cao, K., Collings, C.K., Marshall, S.A., Rendleman, E.J., Ozark, P.A., Chen,  
620 F.X., Morgan, M.A., Wang, L. and Shilatifard, A. (2017) Histone H3K4 methylation-  
621 dependent and -independent functions of Set1A/COMPASS in embryonic stem cell self-  
622 renewal and differentiation. *Genes Dev*, **31**, 1732-1737.
- 623 14 Fang, L., Zhang, J., Zhang, H., Yang, X., Jin, X., Zhang, L., Skalnik, D.G., Jin, Y.,  
624 Zhang, Y., Huang, X. *et al.* (2016) H3K4 Methyltransferase Set1a Is A Key Oct4  
625 Coactivator Essential for Generation of Oct4 Positive Inner Cell Mass. *Stem Cells*, **34**,  
626 565-580.
- 627 15 Bledau, A.S., Schmidt, K., Neumann, K., Hill, U., Ciotta, G., Gupta, A., Torres, D.C., Fu,  
628 J., Kranz, A., Stewart, A.F. *et al.* (2014) The H3K4 methyltransferase Setd1a is first  
629 required at the epiblast stage, whereas Setd1b becomes essential after gastrulation.  
630 *Development*, **141**, 1022-1035.
- 631 16 Qiao, H., Li, Y., Feng, C., Duo, S., Ji, F. and Jiao, J. (2018) Nap111 Controls Embryonic  
632 Neural Progenitor Cell Proliferation and Differentiation in the Developing Brain. *Cell*  
633 *Rep*, **22**, 2279-2293.
- 634 17 Li, Y. and Jiao, J. (2017) Histone chaperone HIRA regulates neural progenitor cell  
635 proliferation and neurogenesis via beta-catenin. *J Cell Biol*, **216**, 1975-1992.
- 636 18 Alsulami, M., Munawar, N., Dillon, E., Oliviero, G., Wynne, K., Alsolami, M., Moss, C., P,  
637 O.G., O'Meara, F., Cotter, D. *et al.* (2019) SETD1A Methyltransferase Is Physically and  
638 Functionally Linked to the DNA Damage Repair Protein RAD18. *Mol Cell Proteomics*,  
639 **18**, 1428-1436.
- 640 19 Higgs, M.R., Sato, K., Reynolds, J.J., Begum, S., Bayley, R., Goula, A., Vernet, A.,  
641 Paquin, K.L., Skalnik, D.G., Kobayashi, W. *et al.* (2018) Histone Methylation by SETD1A  
642 Protects Nascent DNA through the Nucleosome Chaperone Activity of FANCD2. *Mol*  
643 *Cell*, **71**, 25-41 e26.
- 644 20 Hamm, J.P., Shymkiv, Y., Mukai, J., Gogos, J.A. and Yuste, R. (2020) Aberrant Cortical  
645 Ensembles and Schizophrenia-like Sensory Phenotypes in Setd1a(+/-) Mice. *Biol*  
646 *Psychiatry*, **88**, 215-223.
- 647 21 Mukai, J., Cannavo, E., Crabtree, G.W., Sun, Z., Diamantopoulou, A., Thakur, P.,  
648 Chang, C.Y., Cai, Y., Lomvardas, S., Takata, A. *et al.* (2019) Recapitulation and  
649 Reversal of Schizophrenia-Related Phenotypes in Setd1a-Deficient Mice. *Neuron*, **104**,  
650 471-487 e412.
- 651 22 Nagahama, K., Sakoori, K., Watanabe, T., Kishi, Y., Kawaji, K., Koebis, M., Nakao, K.,  
652 Gotoh, Y., Aiba, A., Uesaka, N. *et al.* (2020) Setd1a Insufficiency in Mice Attenuates  
653 Excitatory Synaptic Function and Recapitulates Schizophrenia-Related Behavioral  
654 Abnormalities. *Cell Rep*, **32**, 108126.
- 655 23 Skarnes, W.C., Rosen, B., West, A.P., Koutsourakis, M., Bushell, W., Iyer, V., Mujica,  
656 A.O., Thomas, M., Harrow, J., Cox, T. *et al.* (2011) A conditional knockout resource for  
657 the genome-wide study of mouse gene function. *Nature*, **474**, 337-342.
- 658 24 Schwenk, F., Baron, U. and Rajewsky, K. (1995) A cre-transgenic mouse strain for the  
659 ubiquitous deletion of loxP-flanked gene segments including deletion in germ cells.  
660 *Nucleic Acids Res*, **23**, 5080-5081.
- 661 25 Livak, K.J. and Schmittgen, T.D. (2001) Analysis of relative gene expression data using  
662 real-time quantitative PCR and the 2(-Delta Delta C(T)) Method. *Methods*, **25**, 402-408.
- 663 26 Javitt, D.C. (2009) Sensory processing in schizophrenia: neither simple nor intact.  
664 *Schizophr Bull*, **35**, 1059-1064.
- 665 27 Perry, W., Minassian, A., Lopez, B., Maron, L. and Lincoln, A. (2007) Sensorimotor  
666 gating deficits in adults with autism. *Biol Psychiatry*, **61**, 482-486.

- 667 28 Davis, B.A., David, F., O'Regan, C., Adam, M.A., Harwood, A.J., Crunelli, V. and Isles,  
668 A.R. (2020) Impairments in sensory-motor gating and information processing in a mouse  
669 model of Ehmt1 haploinsufficiency. *Brain Neurosci Adv*, **4**, 2398212820928647.
- 670 29 Frega, M., Linda, K., Keller, J.M., Gümüř-Akay, G., Mossink, B., van Rhijn, J.-R.,  
671 Negwer, M., Gunnewiek, T.K., Foreman, K., Kompier, N. *et al.* (2019) Neuronal network  
672 dysfunction in a human model for Kleefstra syndrome mediated by enhanced NMDAR  
673 signaling. *bioRxiv*, in press., 585596.
- 674 30 Iacono, G., Dubos, A., Meziane, H., Benevento, M., Habibi, E., Mandoli, A., Riet, F.,  
675 Selloum, M., Feil, R., Zhou, H. *et al.* (2018) Increased H3K9 methylation and impaired  
676 expression of Protocadherins are associated with the cognitive dysfunctions of the  
677 Kleefstra syndrome. *Nucleic Acids Res*, **46**, 4950-4965.
- 678 31 Balemans, M.C., Kasri, N.N., Kopanitsa, M.V., Afinowi, N.O., Ramakers, G., Peters,  
679 T.A., Beynon, A.J., Janssen, S.M., van Summeren, R.C., Eeftens, J.M. *et al.* (2013)  
680 Hippocampal dysfunction in the Euchromatin histone methyltransferase 1 heterozygous  
681 knockout mouse model for Kleefstra syndrome. *Hum Mol Genet*, **22**, 852-866.
- 682 32 Geyer, M.A., Krebs-Thomson, K., Braff, D.L. and Swerdlow, N.R. (2001)  
683 Pharmacological studies of prepulse inhibition models of sensorimotor gating deficits in  
684 schizophrenia: a decade in review. *Psychopharmacology (Berl)*, **156**, 117-154.

685

686

687 **SUPPLEMENTARY INFORMATION**

688

689 **Table S1.** qRT-PCR primer sequences and product sizes for *Setd1a* and three  
690 housekeeping genes (*Hprt*, *Dynein*, and *B2m*).

| Target        | Forward primer         | Reverse primer           | Product size (bp) |
|---------------|------------------------|--------------------------|-------------------|
| <i>Setd1a</i> | CCCTCCCGGTTCTTAAGTTT   | CATTGTCATTGAGCCTCGCA     | 90                |
| <i>Hprt</i>   | GCGATGATGAACCAGGTTATGA | GCCTCCCATCTCCTTCATGA     | 146               |
| <i>Dynein</i> | GACCTCAGGCTCAGACGAAGAC | AAGACGCTCATGGCATCACA     | 116               |
| <i>B2m</i>    | TTCTGGTGCTTGTCTCACTGA  | CAGTATGTTCCGGCTTCCCATTTC | 104               |

691

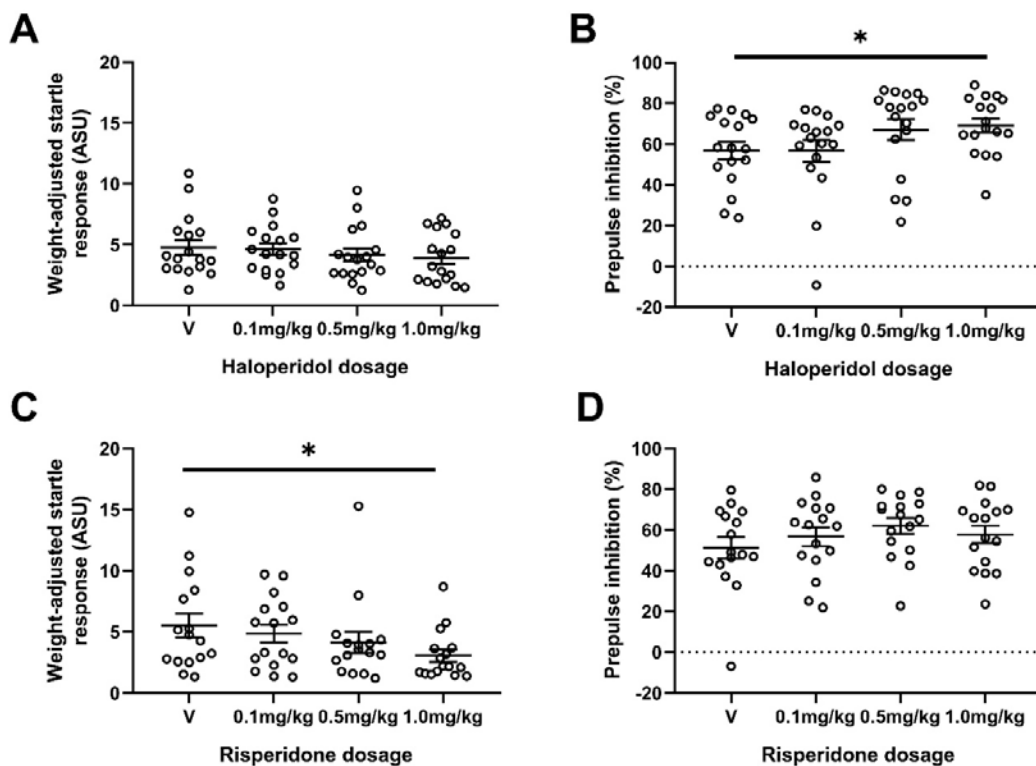

692

693 **Figure S1. Effects of haloperidol (N = 17) and risperidone (N = 16) on**  
694 **sensorimotor gating in male C57BL/6J mice. A)** No significant main effect of  
695 haloperidol dose on ASR ( $F(3, 48) = 1.43, p = .25$ ). **B)** Significant main effect of  
696 haloperidol dose on PPI ( $F(3, 48) = 4.11, p = .01$ ). Bonferroni-corrected post-hoc  
697 tests revealed significantly increased PPI at 1.0 mg/kg compared to vehicle ( $p = .04$ )  
698 but not at 0.1 mg/kg ( $p = .99$ ) or 0.5 mg/kg ( $p = .18$ ). **C)** Significant main effect of  
699 risperidone dose on ASR ( $F(3, 45) = 6.42, p = .001$ ). Bonferroni corrected post-hoc  
700 tests revealed significantly decreased ASR at 1.0 mg/kg relative to vehicle ( $p = .03$ )  
701 but not at 0.1 mg/kg ( $p = .46$ ) or 0.5 mg/kg ( $p = .10$ ). **D)** No significant main effect of  
702 risperidone dose on PPI ( $F(3, 45) = 2.12, p = .11$ ).

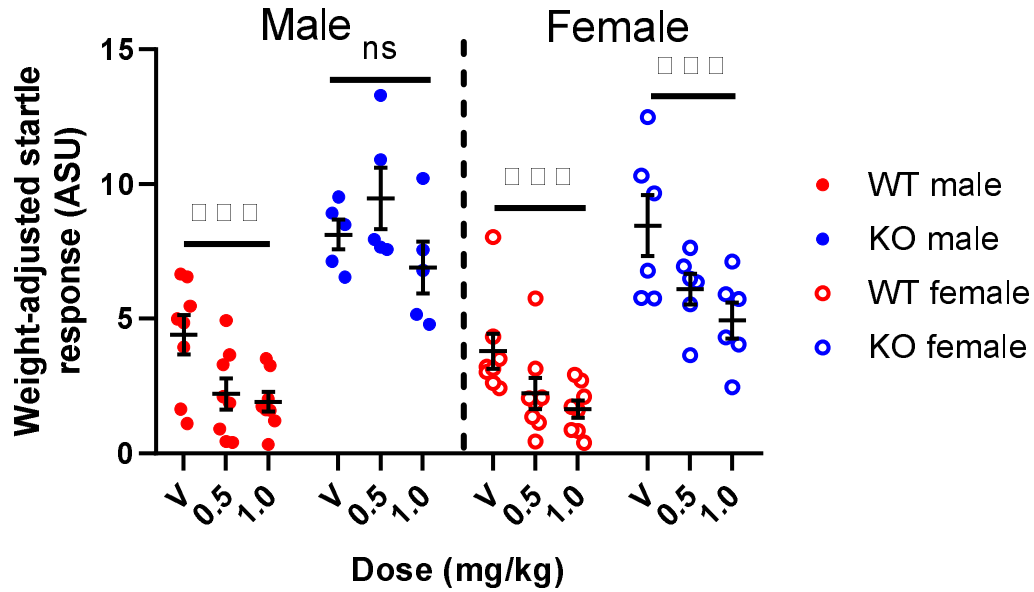

703

704 **Figure S2. Effect of risperidone on ASR in *Setd1a*<sup>+/-</sup> and WT mice separated by**

705 **sex. Mean (+/- SEM) ASR at 120 dB (above background) following IP administration**

706 **of vehicle, 0.5 or 1.0 mg/kg risperidone, presented separately for males and females.**

707
